# Supplementary material for: Deferiprone Related Bone Disease May Be Related to Associated Gilbert Syndrome
Source: Preprints.org preprint supplement (doi:10.20944/preprints202206.0203.v1), 2022-06-14
Supplement: Supplementary file 1 [file supplementary]

**Table 1. Baseline Characteristics of Patients with Transfusion Dependent Thalassemia (TDT):**

| **Variables** | **Mean+ SD** |
| --- | --- |
| Age (yr) Mean±SD | 14.73± 3.44 |
| Sex  Male n (%)  Female | 80 (12/15)  20 (3/15) |
| pretransfusion Hb(g/L) Mean ± SD | 93.93± 4.2 |
| Annual Transfusion Requirement (mL/kg/yr)  Mean ±SD | 140.06±12.97 |
| Serum ferritin (µg/L) | 3181.73± 1335.87 |
| ALT (U/L) Mean ± SD | 26.93±4.32 |
| AST(U/L) Mean ± SD | 28.67±3.83 |
| S. Bilirubin(mg/dl) (Indirect) Mean ± SD | 1.74 ± 1.07 |
| Mean Reticulocyte count | 0.76± 0.19 |

**Table 2. Gilbert Mutation pattern in patients with Transfusion Dependent Thalassemia (TDT) with various joint deformities:**

| **S.NO** | **Age**  **(Year)** | **Sex** | **Gilbert mutation** | **Clinical deformity** | **Radiological deformity** | **Mean S. Bilirubin**  **(mg/dl)** |
| --- | --- | --- | --- | --- | --- | --- |
| 1. | 14.25 | M | TA6/TA6 | ulnar deformity | Yes | 0.75 |
| 2. | 15 | F | TA6/TA7 | ulnar deformity | Yes | 1.25 |
| 3. | 14 | F | TA6/TA7 | Elbow deformity | Yes | 0.75 |
| 4. | 15 | M | TA6/TA7 | ulnar deformity | Yes | 1.2 |
| 5. | 17.75 | M | TA6/TA7 | ulnar deformity | Yes | 2 |
| 6. | 14.75 | M | TA7/TA7 | ulnar deformity | Yes | 4.5 |
| 7. | 14yr | F | TA6/TA6 | ulnar deformity | Yes | 0.9 |
| 8. | 18 | M | TA6/TA7 | ulnar deformity | Yes | 0.75 |
| 9. | 14 | M | TA6/TA6 | ulnar deformity | Yes | 2.5 |
| 10. | 15 | M | TA7/TA7 | elbow deformity | Yes | 2.5 |
| 11. | 7.75 | M | TA6/TA7 | knee deformity | No | 2.25 |
| 12. | 6 | M | TA6/TA7 | knee deformity | No | 0.75 |
| 13. | 14 | M | TA7/TA7 | ulnar deformity | Yes | 2.5 |
| 14. | 15 | M | TA7/TA7 | Knee deformity | Yes | 2.5 |
| 15. | 13 | M | TA6/TA6 | Hip deformity | Yes | 0.75 |
